# Supplementary material
Source: publisher figshare collection journal article supplement (https://aacr.figshare.com/ndownloader/files/39924735)
Supplement: Supplementary file 1 [file 39924735]

## Sheet: Geisinger
			Supplementary Table 5
	AUC	p value	Sensitivity	Specificity
Feature 1 - Clustered Immune Count / Immune Count	0.837	<0.0001	0.905	0.71
Feature 2 - Clustered Immune Count / Total Count	0.881	<0.0001	0.905	0.833
Feature 3 - Clustered Immune Count / Clustered Tumor Count	0.795	<0.0001	0.81	0.767
Feature 4 - Clustered Immune Count / Unclustered Immune Count	0.899	<0.0001	0.857	0.9
Feature 5 - Total Immune Count / Total Cell Count	0.904	<0.0001	0.905	0.833
Feature 6 - Immune Area / Tumor Area	0.677	0.012	0.524	0.867
Feature 7 - Immune Area / Total Area	0.509	0.921	0.762	0.4

## Sheet: Yale
Table. ROC values for feature removal in YMS cohort.
	AUC	p value	Sensitivity	Specificity
Feature 1	0.902	<0.0001	0.862	0.913
Feature 2	0.911	<0.0001	0.793	0.935
Feature 3	0.764	<0.0001	0.672	0.848
Feature 4	0.906	<0.0001	0.81	0.913
Feature 5	0.928	<0.0001	0.81	0.913
Feature 6	0.937	<0.0001	0.879	0.978
Feature 7	0.609	0.048	0.431	0.891
